# Supplementary material for: Ag2S-Glutathione quantum dots for NIR image guided photothermal therapy
Source: Royal Society of Chemistry journal article supplement (doi:10.1039/c9nj04608a), 2020-01-01
Supplement: c9nj04608a1.pdf [file c9nj04608a1.pdf]

## Supporting Information

### Ag<sub>2</sub>S-Glutathione Quantum Dots for NIR Image Guided Photothermal Therapy

Mahshid Hashemkhani <sup>a</sup>, Kubra Bilici <sup>a</sup>, Abdullah Muti <sup>b</sup>, Alphan Sennaroğlu<sup>a, b, c</sup>, Havva Yağci Acar<sup>\*a, c, d</sup>

<sup>a</sup> Koc University, Graduate School of Materials Science and Engineering, Rumelifeneri Yolu, Sariyer 34450, Istanbul, Turkey

<sup>b</sup> Koc University, Departments of Physics and Electrical-Electronics Engineering, Rumelifeneri Yolu, Sariyer 34450, Istanbul, Turkey

<sup>c</sup> Koc University, Departments of Chemistry, Rumelifeneri Yolu, Sariyer 34450, Istanbul, Turkey

<sup>d</sup> Koc University, KUYTAM, Rumelifeneri Yolu, Sariyer 34450, Istanbul, Turkey

\*Corresponding Author:

Havva Yağci Acar

Address: Departments of Chemistry, Koc University, Rumelifeneri Yolu, Sariyer 34450, Istanbul, Turkey

E-mail: fyagci@ku.edu.tr; Fax: +902123381559; Tel: +902123381742

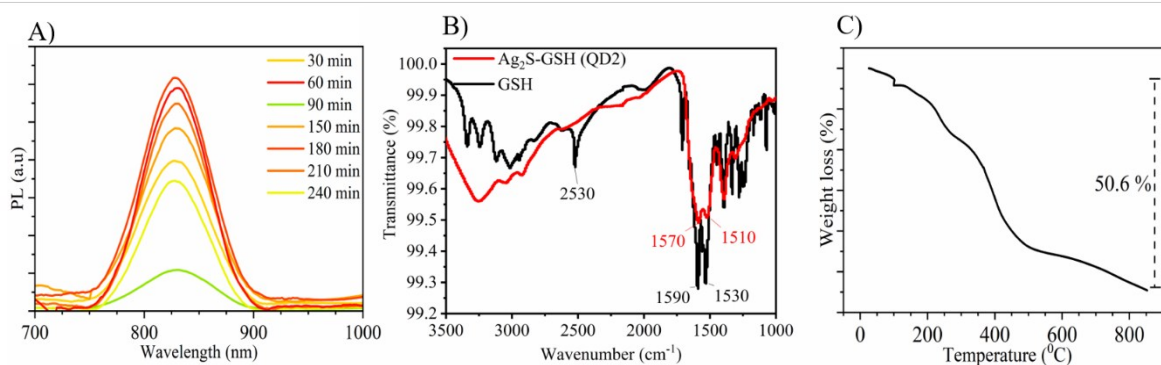

**Fig. S1** Absorbance calibrated photoluminescence spectra of (A) QD5 synthesized with TAA at 50 °C at different time, (B) FTIR spectrum of QD2 and glutathione and (C) Thermogravimetric analysis (TGA) of QD2.

**Table S1** Time dependent changes in the particle properties\*

| Time                  | $\lambda_{\text{abs(max)}}^{\text{a}}$ (nm) | Size <sup>b</sup> (nm) | $\lambda_{\text{em(max)}}^{\text{c}}$ (nm) | Dh-number <sup>c</sup> (nm) | Dh-intensity <sup>d</sup> (nm) |
|-----------------------|---------------------------------------------|------------------------|--------------------------------------------|-----------------------------|--------------------------------|
| 1 <sup>st</sup> day   | 923                                         | 3.01                   | 891                                        | 6.7                         | 3.8 ± 0.1                      |
| 1 <sup>st</sup> month | 923                                         | 3.01                   | 891                                        | 12.8                        | 4.1 ± 0.2                      |
| 9 <sup>th</sup> month | 946                                         | 3.09                   | 891                                        | 30.2                        | 4.0 ± 0.1                      |
| 1 year                | 946                                         | 3.09                   | 897                                        | 48.9                        | 4.6 ± 0.4                      |

\* QD2 was used for this experiment. <sup>a</sup> Absorbance onset. <sup>b</sup> Crystal diameter calculated using the Brus equation. <sup>c</sup> Hydrodynamic diameter measured by DLS and reported as the number average. <sup>d</sup> Hydrodynamic diameter measured by DLS and reported as the intensity average.

### Photothermal efficiency calculation:

The photothermal efficiency was calculated by using following formula

$$\eta = \frac{ha(T_{\text{max}} - T_{\text{amb}}) - Q_{\text{dis}}}{P(1 - 10^{-A_{795\text{nm}}})} \quad (\text{Eq. S1})$$

where h is the heat transfer coefficient, a is the irradiated area,  $T_{\text{max}}$  is the equilibrium temperature,  $T_{\text{amb}}$  is the ambient temperature, and  $Q_{\text{dis}}$  is the heat dissipated due to light absorption in the polystyrene cell. P and  $A_{795\text{nm}}$  appearing in the denominator represent the laser power and absorbance of the  $\text{Ag}_2\text{S}$ -GSH QDs, respectively, at 795 nm.

ha can be calculated by using the following formulas:

$$ha = \frac{\sum m_i C_{p,i}}{\tau_s}$$

$$t = -\tau_s \ln \theta$$

$$\theta = \frac{T - T_{\text{amb}}}{T_{\text{max}} - T_{\text{amb}}}$$

Above, m,  $C_p$ , t,  $\tau_s$  are the mass of sample, the thermal capacity, cooling time after irradiation, and the sample system time constant, respectively. The quantity  $Q_{\text{dis}}$  was determined by using the following formula which accounts for the absorption of the laser power within water and the polystyrene cuvette:

$$Q_{\text{dis}} = ha(T_{\text{max,water}} - T_{\text{amb,water}})$$

The values of  $T_{\text{max}}$ ,  $T_{\text{amb}}$ ,  $\tau_s$ ,  $m_{\text{cuvette}}$ ,  $m_{\text{sample}}$ ,  $C_{\text{cuvette}}$ ,  $C_{\text{water}}$  were 45 °C, 25 °C, 220.8 sec, 1.9110 g, 0.7513 g, 1.4 J/g C and 4.186 J/g C, respectively. Therefore, ha was calculated as 26.4 mW/C.  $Q_{\text{dis}}$  was determined to be 0 because there was no significant temperature change in the water at these pump power levels. By substituting these parameters into Equation S1, the PTT efficiency was determined to be 80%.
